# Supplementary material
Source: HighWire-hosted journal article supplement (https://ijgc.bmj.com/content/31/11/1403)
Supplement: inline-supplementary-material-2 [file inline-supplementary-material-2.pdf]

Table 5. Enrollment of Asian patients, expected vs. observed

| Site   | CDC incidence per 100,000 |                |                 |                | Observed Asian | Difference | p value |
|--------|---------------------------|----------------|-----------------|----------------|----------------|------------|---------|
|        | White Patients            | Asian Patients | Expected* Asian | Observed Asian |                |            |         |
| Ovary  | 10.4                      | 8.2            | 1226            | 416            | 3-fold lower   | <0.0001    |         |
| Cervix | 7.3                       | 6.0            | 166             | 17             | 10-fold lower  | <0.0001    |         |
| Uterus | 27.2                      | 20.6           | 79              | 6              | 13-fold lower  | <0.0001    |         |
| Breast | 125                       | 98             | 2455            | 997            | 2.5-fold lower | <0.0001    |         |

\*calculated based on actual enrollment of white patients, and CDC incidence by cancer site for white and Asian patients
