# Supplementary material
Source: HighWire-hosted journal article supplement (https://ijgc.bmj.com/content/31/11/1403)
Supplement: inline-supplementary-material-4 [file inline-supplementary-material-4.pdf]

# INTERNATIONAL JOURNAL OF GYNECOLOGICAL CANCER

## Not immune to inequity: minority under-representation in immunotherapy trials for breast and gynecologic cancers

KV Grette, AL White, EK Awad, JM Scalici, J Young-Pierce, RP Rocconi, NL Jones

53 Trials from 2008 to 2020

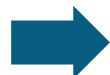

41 trials included race data  
(Breast=19, ovary=12, cervix=6, uterus=4)

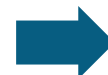

7201 total patients enrolled

Enrollment of black and Asian patients was significantly lower than expected for all cancer sites

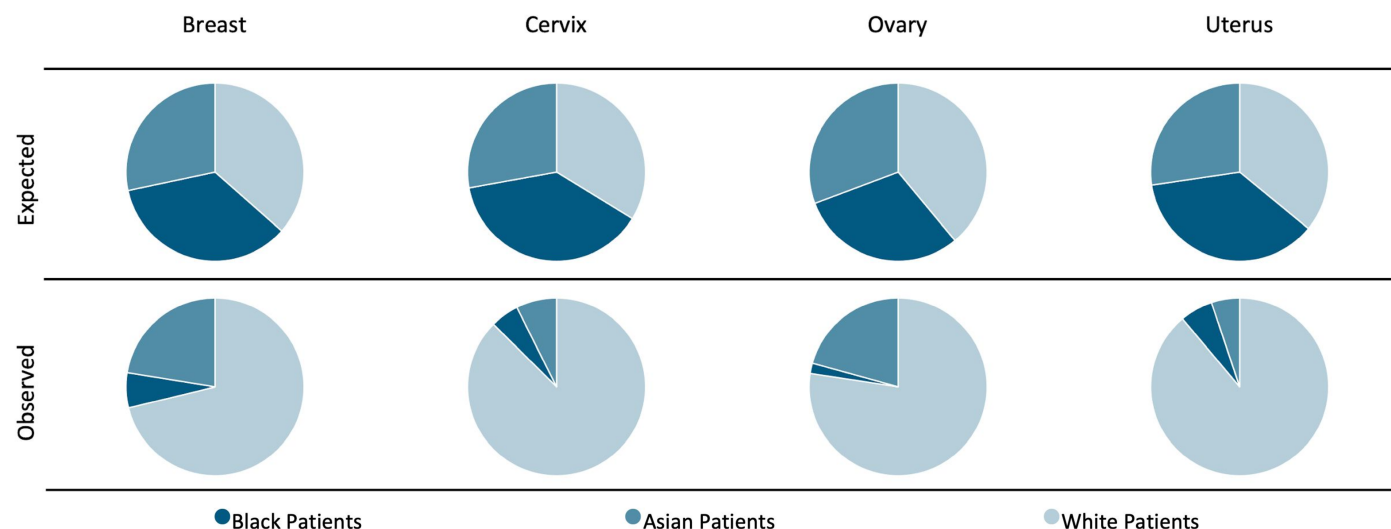

**Equity in clinical trial enrollment must be achieved to address racial disparities in cancer outcomes**

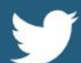

@IJGConline

Copyright © 2020 BMJ Publishing Group Ltd, International Gynecologic Cancer Society, & European Society of Gynaecological Oncology. All rights reserved.
